# Supplementary material for: High-Throughput Resequencing of Maize Landraces at Genomic Regions Associated with Flowering Time
Source: PLoS One. 2017 Jan 3;12(1):e0168910. doi: 10.1371/journal.pone.0168910 (PMC5207663; doi:10.1371/journal.pone.0168910)
Supplement: S1 File — Amplicon information and primer sequences used for amplification. (CSV) [file pone.0168910.s001.csv]

# AmpliSeq_Version=4.01
# Genome=agpv3
# Workflow=DNA
# Total_Amplicons=319
# Num_Pools=2
# Pool1=160_amplicons
# Pool2=159_amplicons
# * primer sequences are manufactured specifically for use with the Ion AmpliSeq Kits and contain proprietary modifications.
Amplicon_ID	Ion_AmpliSeq_Fwd_Primer*	Ion_AmpliSeq_Rev_Primer*	Lineitem_Name	Genome_Version	Chr	Amplicon_Start	Insert_Start	Insert_Stop	Amplicon_Stop
AMPL3628	CCTGCTTCTAATAATCTCGTCTGGAT	TGATGGGAAGAGGGTCAGTGAA	GRMZM2G011357	agpv3	chr1	239672574	239672600	239672794	239672816
AMPL3782	CGGCAGATGTTGGGCTTT	TTTCAGTTTTATCAAAATTAATCTTTAGCCCTG	GRMZM2G154580	agpv3	chr1	90221876	90221894	90222025	90222058
AMPL3790	CACGCAGGATGTCGGCA	GTGACGCTGTCGTGGTC	GRMZM2G154580	agpv3	chr1	90224179	90224196	90224408	90224425
AMPL5001	CCATTATGAGAACACATGCCTCTCA	CGCTATATACTTCAAGCTGCATTGAG	GRMZM2G011357	agpv3	chr1	239667827	239667852	239668092	239668118
AMPL5002	GGTGTTCCGTTCATTCGTCTCT	TCGCCCTATCTTGACCTCCATAT	GRMZM2G011357	agpv3	chr1	239668065	239668087	239668416	239668439
AMPL5003	CGACACCGAGGAAGTCCCTA	CTTCTCAACGCCAGCAATAATATCAC	GRMZM2G011357	agpv3	chr1	239668283	239668303	239668578	239668604
AMPL5004	CAGGAAGAAGAGGGTGTTATTAGGG	CATTTGTTTAGCTAATTAACCCGTTTCGT	GRMZM2G011357	agpv3	chr1	239668494	239668519	239668768	239668797
AMPL5005	AGAGAGACCATGCATGCATCAA	ACTGACAAAAGAACCTAGCTAATCATAGGA	GRMZM2G011357	agpv3	chr1	239668747	239668769	239668951	239668981
AMPL5006	TCCATGCATGTAAAGTTTCGTTTAACTTTG	GCACAACAGTGCAATAATGCAGTG	GRMZM2G011357	agpv3	chr1	239668906	239668936	239669238	239669262
AMPL5007	GCAGATGCATGCATGCATGTG	CACATTCCCTTCAAAAATGGAACATATATAG	GRMZM2G011357	agpv3	chr1	239669013	239669034	239669332	239669363
AMPL5008	TGTTGTGCTACTACATATATACTTGCAGTAGT	AAAAACCATGAGTCCCTGGTCA	GRMZM2G011357	agpv3	chr1	239669255	239669287	239669466	239669488
AMPL5009	TTTGACCAGGGACTCATGGTTTT	AGTCATCAGCACGATCTGCG	GRMZM2G011357	agpv3	chr1	239669465	239669488	239669763	239669783
AMPL5010	TCGCAGATCGTGCTGATGAC	CCTAAATCTCTCACCGGACGGAT	GRMZM2G011357	agpv3	chr1	239669763	239669783	239670044	239670067
AMPL5011	GATCGATCCCGTCTAGCTAGGT	TCCATCCATCCATCAGAGCTCT	GRMZM2G011357	agpv3	chr1	239670014	239670036	239670340	239670362
AMPL5012	CGAGAAGTGCTTCTTGATCCCA	GGTCCTGCTCCTGCATATATGC	GRMZM2G011357	agpv3	chr1	239670307	239670329	239670431	239670453
AMPL5013	GGATGGATCGATGAGATGTTATGCTAT	GTGGCGACGAACCGGTT	GRMZM2G011357	agpv3	chr1	239670388	239670415	239670705	239670722
AMPL5014	GCAGACGTAGACGCGCTTA	GGGAACCCAGGTACGTAGTAGT	GRMZM2G011357	agpv3	chr1	239670501	239670520	239670840	239670862
AMPL5015	CATCGGTCGGCGTGATTG	GATCGACGACAGACGATGCA	GRMZM2G011357	agpv3	chr1	239670811	239670829	239671076	239671096
AMPL5016	AGACGAGAGATCAGAGAGCATCAT	CCACAGAACCACATGGGTCTACTATATATA	GRMZM2G011357	agpv3	chr1	239671049	239671073	239671231	239671261
AMPL5017	GGCTAAGCTTTAGCTAGCTACTGATC	GGGCGTGGCTTTTTGGAC	GRMZM2G011357	agpv3	chr1	239671185	239671211	239671520	239671538
AMPL5018	GATGCTGCAATCGAGTGCAC	GCTCAGGTTGTACCACTCCAC	GRMZM2G011357	agpv3	chr1	239671490	239671510	239671656	239671677
AMPL5019	CAATGGCAGCTAGCATGCATG	CGTATCCCTATTATACACGCTCTGAGT	GRMZM2G011357	agpv3	chr1	239671619	239671640	239671962	239671989
AMPL5020	GCGAAGGCTGCTGGAGA	TGGTTGGTGCTAGCTTGCT	GRMZM2G011357	agpv3	chr1	239671935	239671952	239672126	239672145
AMPL5021	AGACCATTGAGGCATTGGCAA	CTGAGCATTAGCTTGTGGTGAAAG	GRMZM2G011357	agpv3	chr1	239672105	239672126	239672379	239672403
AMPL5022	ACTAGTTCACTTTCTGTTTGCAGTGA	CCAATTCCATTGGTCATCTCTGACT	GRMZM2G011357	agpv3	chr1	239672341	239672367	239672633	239672658
AMPL5023	ACAGTGAAAGCAAAAGTTGCACAA	GCTAGGCTAAAGAGCGGACTTTG	GRMZM2G011357	agpv3	chr1	239672760	239672784	239673029	239673052
AMPL5024	TGTGTGTGTGTGTTAGAAAAGGCT	GGAATTATAAACCCAGTAGTACGTACCATC	GRMZM2G011357	agpv3	chr1	239672995	239673019	239673258	239673288
AMPL5095	GTTCTGAAGAGGATCCTGGAAGTTTTTA	TTCCTTAAATTTGTCAATTCTTTTAAGAAGCCA	GRMZM2G154580	agpv3	chr1	90221989	90222017	90222330	90222363
AMPL5096	CTCTAAGGCAGGTAGGGAAACC	CCAATAGTCACAATTGTTGAAGCATTGA	GRMZM2G154580	agpv3	chr1	90222246	90222268	90222592	90222620
AMPL5097	CCATGCGACAAGGTGGATGTA	TTACAGAAGTTTGTTGCGAACTGAATTTT	GRMZM2G154580	agpv3	chr1	90222565	90222586	90222909	90222938
AMPL5098	CGGCAGATGGGAACTATAGTTCAA	CCTCAGTCTATACCACCATTCGCTA	GRMZM2G154580	agpv3	chr1	90222875	90222899	90223205	90223230
AMPL5099	CTGCAGTTCCTTTTCGGTATTTCAAAG	TACTGGCACCAAAGCTGGCG	GRMZM2G154580	agpv3	chr1	90223168	90223195	90223497	90223517
AMPL5100	AGTGTCATAGCTAGGTCTTGCTTG	GTTCCTGTTCTTTCTTCTATGGATCGAT	GRMZM2G154580	agpv3	chr1	90223453	90223477	90223735	90223763
AMPL5101	CTGACGATCAAACCAGTACAGCA	TGCTTGTTTGCTTCTTCCTAGCT	GRMZM2G154580	agpv3	chr1	90223702	90223725	90224026	90224049
AMPL5102	ATTCGCTCGCCCAGCTC	TTGAGGTCGGCGACAGC	GRMZM2G154580	agpv3	chr1	90223996	90224013	90224291	90224308
AMPL5103	TGCACGAGTTCCAGTTCTTCG	GGAAAGAGATTTTGGAACCGAAGC	GRMZM2G154580	agpv3	chr1	90224377	90224398	90224723	90224747
AMPL5104	GTCCTCCAGCGCCACAAT	GGGCCAAACAGCTAGATAAATATAAAGAT	GRMZM2G154580	agpv3	chr1	90224693	90224711	90225010	90225039
AMPL10002	CTAACTTCAGAATTGGAAATGTGATGGC	ACTATTTCCGACGGTTCAGAACTTATTTC	GRMZM2G381691	agpv3	chr10	94266917	94266945	94267255	94267284
AMPL10003	TGACCAGTTTCCGACGGC	GTGTACAGATTGAATCTGTGTGATTGTTTG	GRMZM2G381691	agpv3	chr10	94267227	94267245	94267559	94267589
AMPL10004	AAAAACAGAGAAACAGAATTTGTCTGC	CAGATCAAATCAACCACATCCATTTGA	GRMZM2G381691	agpv3	chr10	94267522	94267549	94267825	94267852
AMPL10005	TCACAATGTTCACAAGTTCACAAGTTC	TACCGACTCCACAATTTAGTTGGG	GRMZM2G381691	agpv3	chr10	94267691	94267718	94268039	94268063
AMPL10006	GATCTAATTACCTGCATCATCTCCTGT	ATCCTATCGATCCTCAGGTTGTGTAT	GRMZM2G381691	agpv3	chr10	94268212	94268239	94268548	94268574
AMPL10008	ACACAACCTGAGGATCGATAGGA	TCTTCTATGTGTTTATGTTATTTTCTCTTGCCT	GRMZM2G381691	agpv3	chr10	94268551	94268574	94268832	94268865
AMPL10009	GGGCATTCCTATGTTCCGCATTA	TCCTGCTCGTGAGGAGGATAAT	GRMZM2G381691	agpv3	chr10	94269447	94269470	94269730	94269752
AMPL10010	CCTTGCCTCCTCCTCTCGA	GATTAGCGACGTATTACCACCAGATC	GRMZM2G381691	agpv3	chr10	94269983	94270002	94270302	94270328
AMPL10011	GCCATCCTGCATATTGAAAATTATATGTCTTT	TTCAGGATTTAAGAGAGGATCCCGATA	GRMZM2G381691	agpv3	chr10	94270260	94270292	94270518	94270545
AMPL10012	CATTAATTTCTAGATATATTATGAGCCGGTGGT	GATTAGTCAATGAGTTTGAGCGAGATTTC	GRMZM2G381691	agpv3	chr10	94270889	94270922	94271088	94271117
AMPL10013	TGTTGTTCTCCATTGCACGC	TTCACACCGGTCGCCAGT	GRMZM2G381691	agpv3	chr10	94271030	94271050	94271360	94271378
AMPL10014	ATAAAGTTAAAAATTACCTGAATTGCCCACAG	AGACCCTTGGACAGCGC	GRMZM2G381691	agpv3	chr10	94271321	94271353	94271647	94271664
AMPL10016	TCCAAGGGTCTGGCGAG	TACTGCAGCTCCTGCGC	GRMZM2G381691	agpv3	chr10	94271654	94271671	94271777	94271794
AMPL10017	ACGAGTTCGCCGAGATCCC	ACGTCCCTCGTCGACGT	GRMZM2G381691	agpv3	chr10	94271728	94271747	94272032	94272049
AMPL10018	CGCTGCACCACCTTCGA	CCTAACGTCGTCCGTTACCC	GRMZM2G381691	agpv3	chr10	94271868	94271885	94272153	94272173
AMPL10019	CGTGTGTGCGTTGTGTGC	CGGATTCTCAATCCAAGGTGCA	GRMZM2G381691	agpv3	chr10	94272125	94272143	94272461	94272483
AMPL5036	GGAGCTAGCTAGCAGGCTTC	AAGGAGCCAGCACTGATCG	GRMZM2G381691	agpv3	chr10	94262270	94262290	94262475	94262494
AMPL5037	TCTACCGGCATTTGCAGCT	ATATCTGATGTTCATCAGGCATGCAT	GRMZM2G381691	agpv3	chr10	94262445	94262464	94262757	94262783
AMPL5038	GTACTTTGCTTGATATGCTGAATGGG	CATGCACATGTCCAGCTGTG	GRMZM2G381691	agpv3	chr10	94262727	94262753	94263033	94263053
AMPL5039	GGGTAGAATATTAGATCTTAAGCCATGTGA	GCCCACTGATGTATCTACCTGGTTAA	GRMZM2G381691	agpv3	chr10	94262809	94262839	94263151	94263177
AMPL5040	CATAACAATCAGACGACAAGCTAGGT	CCTCCCTTTCTTTTTCTTCACCACT	GRMZM2G381691	agpv3	chr10	94263115	94263141	94263460	94263485
AMPL5041	GATCGATTTCGACCATACAAATGCG	CCGAAGTCTATTATTGCTGTAATGACAAGA	GRMZM2G381691	agpv3	chr10	94263211	94263236	94263555	94263585
AMPL5042	GCAAGCTGCTTTCTCCCTTTTATC	AACATAGCCATGAGTTAAATCACTGATGT	GRMZM2G381691	agpv3	chr10	94263485	94263509	94263783	94263812
AMPL5043	GTGTATAGTCAATGCTTTTGACTACTGGT	AAGACACTCTGGTGCACGAAAT	GRMZM2G381691	agpv3	chr10	94263744	94263773	94264050	94264072
AMPL5044	TGAGAACTTTGGAAGCGCTGAT	CGATCACCTGCATAAAGGACCTT	GRMZM2G381691	agpv3	chr10	94263873	94263895	94264220	94264243
AMPL5045	CAACTCATGGCAAGATCTCTTGG	AAGCGCCACCATCGTAAGTATT	GRMZM2G381691	agpv3	chr10	94264187	94264210	94264356	94264378
AMPL5046	GACCAAATTCCAATTAGAAACCATGCA	CCTGCACGAGTTCCAGTTCTTT	GRMZM2G381691	agpv3	chr10	94264292	94264319	94264635	94264657
AMPL5047	CAGGCGATGGTTTCTTGGTG	CAACAAATCTCCCTCCCAAGCTA	GRMZM2G381691	agpv3	chr10	94264595	94264615	94264902	94264925
AMPL5048	TATATCCGCTGTGTGTGCACAA	CTTTGCTTTTCCTTCACTACGACTTAAA	GRMZM2G381691	agpv3	chr10	94264870	94264892	94265031	94265059
AMPL5049	TGATAGCTAGCTGCTAGGGCT	CCCATTCTCCGGTAGGGAA	GRMZM2G381691	agpv3	chr10	94265000	94265021	94265267	94265286
AMPL9918	CCATGCATGCATCCACGC	GGACAGAATTGGCTAGGCGG	GRMZM2G381691	agpv3	chr10	94266831	94266849	94266955	94266975
AMPL9954	TGAGGTGCAGGTGTGGC	GCTGCTCAATTTGCACGACAA	GRMZM2G381691	agpv3	chr10	94268024	94268041	94268237	94268258
AMPL3700	CAGAGGGAGAGCTGCATGT	AAGGTTGGATAGCACAACTAAACTTT	GRMZM2G033962	agpv3	chr2	219435799	219435818	219436033	219436059
AMPL3716	CATATGCTGCATGATAAATAGGTCCAGA	GGCACTCAAATTCAAGCAGAGAGA	GRMZM2G033962	agpv3	chr2	219438303	219438331	219438534	219438558
AMPL3728	CTGGACTGGCAGAAACGGAGAT	TCTTCCCAAAGTTCCGGTCTTTC	GRMZM2G033962	agpv3	chr2	219440396	219440418	219440564	219440587
AMPL3732	CTGACCGGGAAAGAATAAACAAGGAACT	CCCTCCCTGAATTTTTGTCATGC	GRMZM2G033962	agpv3	chr2	219441056	219441084	219441301	219441324
AMPL3794	CAGTGACAGCTGAGAGTGCATA	CAAAGCTCTTATTGATTGCCTGTATGAT	GRMZM2G095598	agpv3	chr2	33216039	33216061	33216209	33216237
AMPL3809	ATGAACGCGAATGCAAAACTCA	AGGGAGTACAACTTCTTTGCCC	GRMZM2G095598	agpv3	chr2	33218288	33218310	33218446	33218468
AMPL4026	TACTCTTAGGATATATCATCACAGGAGCG	TGGTTAGTCAGAAGTGGGCTTAGA	GRMZM2G180190	agpv3	chr2	12649187	12649216	12649377	12649401
AMPL4031	CCGCACTTCTTGGCGTAC	TGGCCTGTCCGGATTCCAG	GRMZM2G180190	agpv3	chr2	12649858	12649876	12650057	12650076
AMPL4032	CCAGGTCAGGGAAGCTATCATCATA	GTGCAGCTTGTGTTGTCTTGTC	GRMZM2G180190	agpv3	chr2	12650022	12650047	12650270	12650292
AMPL4042	GCACTGCACTGTAGTCCTAGTCTA	TGGTGTGGGAGTATTTATCAGCCT	GRMZM2G180190	agpv3	chr2	12652221	12652245	12652420	12652444
AMPL4064	GGGATCCATGCTCTCGACTCT	CTTGGAGCAGCCGACAAAC	GRMZM2G180190	agpv3	chr2	12652054	12652075	12652256	12652275
AMPL5054	CCATCGGTGACCACCCTTAT	TATTGAGCTTGCAGACCATATCGAG	GRMZM2G033962	agpv3	chr2	219433676	219433696	219433979	219434004
AMPL5055	GAACCCTCACTGAGGTTGTCTAC	CTCAACGACAATCCCTAGAAAGTGAA	GRMZM2G033962	agpv3	chr2	219433921	219433944	219434157	219434183
AMPL5057	AGCGGCTATACACCCTAGACAT	AGACTATCAGCTCATGGGTAGAGAAG	GRMZM2G033962	agpv3	chr2	219434218	219434240	219434513	219434539
AMPL5058	CCGGTATCTTCGAGGCACTATC	TGCTTCGTGTGCTGATAATGGAA	GRMZM2G033962	agpv3	chr2	219434471	219434493	219434810	219434833
AMPL5059	CAATGTCAGCACTGTCTACCTCA	GGAAACACATGGGCTAGGCC	GRMZM2G033962	agpv3	chr2	219434777	219434800	219435127	219435147
AMPL5060	CTCGACGAACTCACAGTTTATCGA	CCTAGGTGATGAATAGATCTGCCCTATATATAT	GRMZM2G033962	agpv3	chr2	219434899	219434923	219435239	219435272
AMPL5062	ATTTGTTAGAATGACTTAACATTGATTGAATGT	CTTTGCCCAAGCCACATGTC	GRMZM2G033962	agpv3	chr2	219435562	219435595	219435828	219435848
AMPL5063	TCTTTGACCGACTGGTGTTCTTTT	CAGACATTTAAAGACTGTACTCATATCATCACT	GRMZM2G033962	agpv3	chr2	219436009	219436033	219436350	219436383
AMPL5064	AGTTATCTCTGCCAAAAATGGCCA	CGTATAGGCTTGACCAAAAAGTCAACA	GRMZM2G033962	agpv3	chr2	219436064	219436088	219436394	219436421
AMPL5066	GCATTCAGACCCAGAAGTGTG	GTTCGAGGGCTTTATCCGGT	GRMZM2G033962	agpv3	chr2	219436674	219436695	219437027	219437047
AMPL5067	GGCACAATTGCCTATAATCACCAAA	GTTGGTTAGGTGGTCTGGTAGC	GRMZM2G033962	agpv3	chr2	219436909	219436934	219437231	219437253
AMPL5068	ATACAACCGCGACCACGATC	GTGTGTTAGGTGAAATAAAACCGCATC	GRMZM2G033962	agpv3	chr2	219437111	219437131	219437430	219437457
AMPL5070	GCGGTTTTATTTCACCTAACACACTTAAAT	CCAGCTTTTCCACAGACAAATATTTCTAAA	GRMZM2G033962	agpv3	chr2	219437434	219437464	219437663	219437693
AMPL5071	AAAAAGTGTCGATTGTAATGTCTTACCTTT	GAACGTCAGTGGCAAACATGAAA	GRMZM2G033962	agpv3	chr2	219437494	219437524	219437793	219437816
AMPL5073	GTCCCACATGAGAACATTTTGTAACTTAG	CTTGCAAGGTTTGACAAGAAACCATATA	GRMZM2G033962	agpv3	chr2	219437833	219437862	219438144	219438172
AMPL5074	CAGAGCTTGGTAATGTGTGAAAGAC	TGGTAGCCATCACCAACAAACAAT	GRMZM2G033962	agpv3	chr2	219438014	219438039	219438341	219438365
AMPL5075	CGTGTACCCAATCACCTAAGGTAC	ATTCAGTTCATCGACAATTAGGCTATCTC	GRMZM2G033962	agpv3	chr2	219438505	219438529	219438803	219438832
AMPL5076	TCCATTAATGGGTTATGAACAGGGTAATC	GGAACATTGCTTTGATTTTTGATATGTGTG	GRMZM2G033962	agpv3	chr2	219438660	219438689	219439003	219439033
AMPL5078	AAAAAGTATGGGCACATTCTAACTTGTT	CGGTTGAGCATGACATACCATTAGT	GRMZM2G033962	agpv3	chr2	219439058	219439086	219439286	219439311
AMPL5079	AGATAAGAGCAACAGAAACTGCAAGA	GATTCCTTTGAATTGTTTTCATGATCTGCT	GRMZM2G033962	agpv3	chr2	219439250	219439276	219439478	219439508
AMPL5081	CAGCAGATCATGAAAACAATTCAAAGGAA	CAATTCCGTTGTTCGTCGTCTT	GRMZM2G033962	agpv3	chr2	219439478	219439507	219439750	219439772
AMPL5082	TGGAGATGGTGCCAACAACAAA	GTAACATACTGTTGCTCTCATAACTCACTA	GRMZM2G033962	agpv3	chr2	219439719	219439741	219439833	219439863
AMPL5083	CAAATCTGTCGGCTTTTACAAGGTG	CGCTGATGTGTATCCATTAGCCTTAATA	GRMZM2G033962	agpv3	chr2	219439787	219439812	219440114	219440142
AMPL5084	AAAGGATGTTGTGACAAAACCCATG	CCACCTCCAACTCCACTTTTGT	GRMZM2G033962	agpv3	chr2	219440079	219440104	219440428	219440450
AMPL5085	GCGACAAGCACAGCTAAAGAAATAT	GGGTGTCGGTCATCTCTCTCTA	GRMZM2G033962	agpv3	chr2	219440529	219440554	219440810	219440832
AMPL5086	TCAAGCAAGCTGTGCAAAATCAG	GCTTAGGAATGCATACATACATACACATGT	GRMZM2G033962	agpv3	chr2	219440780	219440803	219441094	219441124
AMPL5121	GGGAGGAAGTCCTTGCTTGTAAT	GTTCGAGAAGACGATCCGGTAC	GRMZM2G095598	agpv3	chr2	33216176	33216199	33216506	33216528
AMPL5122	GGCGGAGGAGTACATCTCCT	ACGTGACGTCCTATATCTCACTCTC	GRMZM2G095598	agpv3	chr2	33216390	33216410	33216695	33216720
AMPL5123	CCTGCAATCGTATCCGTGTCTTTATT	CCACGACGGAGGTGTTCTTC	GRMZM2G095598	agpv3	chr2	33216659	33216685	33216961	33216981
AMPL5124	AGTCGAGGTCGAGGTACGGG	TGCGAGGTCTGCGAGCA	GRMZM2G095598	agpv3	chr2	33216931	33216951	33217238	33217255
AMPL5125	GGTTCGCCGAGTGGATGTC	TTGGCTGAGAATCGCTTCGT	GRMZM2G095598	agpv3	chr2	33217159	33217178	33217490	33217510
AMPL5126	CTCGCTCGGCAATTCCTAGTAG	GAATCGTCGAGGCTTGATTCAC	GRMZM2G095598	agpv3	chr2	33217458	33217480	33217759	33217781
AMPL5127	CGTGCGCAGTTAAAACGCTG	GAGAGCGTCCATTTTTAGCATGG	GRMZM2G095598	agpv3	chr2	33217708	33217728	33218014	33218037
AMPL5128	CGCGATCTCGCTCTTATCTACT	GTTGGTATAGCCGCAACGAAAAA	GRMZM2G095598	agpv3	chr2	33217970	33217992	33218320	33218343
AMPL5129	GGCCCTTGGTGAGAGTTG	AGACACCATGTGCATGGCT	GRMZM2G095598	agpv3	chr2	33218871	33218889	33219176	33219195
AMPL5239	GGCCGAACAAGTGACGTC	ACATCGACGCCGTCTTCTC	GRMZM2G180190	agpv3	chr2	12649349	12649367	12649656	12649675
AMPL5240	CGACGACGCAGCTAGAACATC	ACTGCAGGTGACCAACCAG	GRMZM2G180190	agpv3	chr2	12649528	12649549	12649883	12649902
AMPL5241	CCATGCATGCCTATCTGTATCTGA	AAAAAGATCTAGTGGCATGCAAAAGG	GRMZM2G180190	agpv3	chr2	12650231	12650255	12650537	12650563
AMPL5242	ATTCAATCTAGCTATCCGTATGCACC	GTCAGACTCGACGGAGTCTTC	GRMZM2G180190	agpv3	chr2	12650990	12651016	12651270	12651291
AMPL5243	GGCTCTGTGACCACGAAGG	CATGTTGAGTTGAGTTCTGCTTGC	GRMZM2G180190	agpv3	chr2	12651211	12651230	12651544	12651568
AMPL5244	CAGTTGCGATATGATTGAACAAGAACA	CACGCTCCTCGGCATGA	GRMZM2G180190	agpv3	chr2	12651501	12651528	12651821	12651838
AMPL5245	CGGCCATCATGTCGTCGAG	GAGTCAAGGAGCACGAGTTAGG	GRMZM2G180190	agpv3	chr2	12651792	12651811	12652087	12652109
AMPL5246	CCTACATTACGTGCTGGAACATAAAAAG	CAGAGACGTCCGGTTTGTACTC	GRMZM2G180190	agpv3	chr2	12652382	12652410	12652687	12652709
AMPL5247	GGCGAAGCGAAGAGTGGATTT	TTTTTGTCTCCCATAGATTTTCCTGCT	GRMZM2G180190	agpv3	chr2	12652665	12652686	12652990	12653017
AMPL5248	CGGGACTACGGGAGGAGTA	CGCCTGCTTTGTCTGTTGG	GRMZM2G180190	agpv3	chr2	12652961	12652980	12653214	12653233
AMPL5249	TCGCTCGATGTCTTCGCTG	GCGTGATGGCAAAAGCACTG	GRMZM2G180190	agpv3	chr2	12653185	12653204	12653539	12653559
AMPL5250	CTGCGTGCTCAGGTACCTAT	CGCGAGGAACGTTGTCTTCA	GRMZM2G180190	agpv3	chr2	12653482	12653502	12653783	12653803
AMPL5251	CCTCACCCACTCCACCAAC	GGAGCTGTAGCTGCTCTTCTG	GRMZM2G180190	agpv3	chr2	12653754	12653773	12653924	12653945
AMPL5252	CCGAGGACGGTGAAGTACCT	AACGCAGGTCCTCCGGTTG	GRMZM2G180190	agpv3	chr2	12653894	12653914	12654216	12654235
AMPL21354	GTACGGCAGCAAGCGCATC	CAGAGCATGGAGCTGAGGA	.	agpv3	chr3	3994497	3994516	3994739	3994758
AMPL21405	AGTTGTAATATTTTGATTTTACGTGGTCAAA	TGGGAATTGGGCCAGGC	GRMZM2G045275	agpv3	chr3	218986046	218986077	218986251	218986268
AMPL21717	TGGAGTCATGGAATTTCTTGGAGG	AGGCAGCGCGATCTGCT	.	agpv3	chr3	3993892	3993916	3994249	3994266
AMPL21718	ATCGGCCATGGTGGTCCTC	TTGACGCCGAGCAGGAGGTA	.	agpv3	chr3	3994215	3994234	3994545	3994565
AMPL21719	GCATGTTTGCTCTCCCTTTCCT	CGTGGGTCAAATGGCGTGTA	.	agpv3	chr3	3994692	3994714	3995046	3995066
AMPL21720	TGTCCGTGGATAAGACTGCC	ATTTATTTTCTTCTGGCTGGGTTTCTTTG	.	agpv3	chr3	3994985	3995005	3995266	3995295
AMPL21721	CCTATCGATGGAGACATCGCT	CGGAGCACCGAGATGATCTG	.	agpv3	chr3	3995235	3995256	3995565	3995585
AMPL21722	CGGACAGCGACTGCATG	ACCACCACCCTGTGCCT	.	agpv3	chr3	3995471	3995488	3995824	3995841
AMPL21723	CAGTGCAGGTGTTGACGAAC	GACATACAGAAGCATACATATGGTCGAT	.	agpv3	chr3	3995787	3995807	3996072	3996100
AMPL21728	GAGGCTCTAGAACTTATCTTAAATTGCTCA	GCTGTCAAGCCTGTAAGGCATT	GRMZM2G045275	agpv3	chr3	218979235	218979265	218979564	218979586
AMPL21729	CAGTACACGAACATTTGCAACCA	TTGGGAGTCCTTCCTGATTGTG	GRMZM2G045275	agpv3	chr3	218979523	218979546	218979835	218979857
AMPL21730	GCTCAACACAGTGAAACCGTTC	GCGTGGATCTTCCGGTCAATAC	GRMZM2G045275	agpv3	chr3	218979780	218979802	218980102	218980124
AMPL21731	CCAGCTACGAATCATTTTGGTTCC	AGGTTTCTTGCATCAAGGGACA	GRMZM2G045275	agpv3	chr3	218980070	218980094	218980420	218980442
AMPL21732	CTTCCATCACCTTGGACTTGGA	CCTGCCATGCATATGAACTACTTCC	GRMZM2G045275	agpv3	chr3	218980357	218980379	218980588	218980613
AMPL21733	GTTCCTGGATTCATCACTGGCAT	TCAATGGCTTGTCCCAGTTATGTC	GRMZM2G045275	agpv3	chr3	218980555	218980578	218980776	218980800
AMPL21734	CGGCAAAAGGCTTATAGACAAGAC	CCTGTCCTTGGCAATGCATTAAC	GRMZM2G045275	agpv3	chr3	218980742	218980766	218981070	218981093
AMPL21735	GTCTGAACTTTCGAATTTCCTTTAGGAAG	GCTTTCTGGATTGCTGCATAATGC	GRMZM2G045275	agpv3	chr3	218981026	218981055	218981356	218981380
AMPL21736	GACTGTAGATTTTAACAGGACAGAGTGTAA	GTACCAAGTATTTGTAGCATTCTTTAGACA	GRMZM2G045275	agpv3	chr3	218981314	218981344	218981641	218981671
AMPL21737	GAAAACCAAACAACAGACTTATCATCTTCA	CACGGGAAGTTGGTGCTAAGA	GRMZM2G045275	agpv3	chr3	218981533	218981563	218981857	218981878
AMPL21738	AAATCATCATTTTGCTCTCCATTGTGATG	GTTAATGAACTCTCCAAAGGTTAAGGAGA	GRMZM2G045275	agpv3	chr3	218981818	218981847	218982157	218982186
AMPL21739	CTTTTGATCCTTGCACTGCTTCT	TGTGCTTCAAAATCAATTGCCAAGT	GRMZM2G045275	agpv3	chr3	218982134	218982157	218982436	218982461
AMPL21740	TGATGGTGTTGCCCACTCTATG	CATCCAGGTTTATGGTTATGACAGGA	GRMZM2G045275	agpv3	chr3	218982404	218982426	218982604	218982630
AMPL21741	GTTTCCTTTGAACTTTTCAGATGAACGA	TGAGATTTTGACCCTTAGGTACTCAAATG	GRMZM2G045275	agpv3	chr3	218982537	218982565	218982802	218982831
AMPL21742	TCCAAAGCATCCAACAACTTTCATTTAAAA	AGGCTAAAATTTATTTGCAGGTTCATTTGT	GRMZM2G045275	agpv3	chr3	218982756	218982786	218983051	218983081
AMPL21743	CCCTGGATTTCTTCTCAAGTAGCT	GGGACTAAACATAATGTGTGTGTGTGT	GRMZM2G045275	agpv3	chr3	218982907	218982931	218983179	218983206
AMPL21744	CCATATGTACTACAAAGTAAACTCTCAGCA	GGGTTTGTTTTAAGTTATGTTCTTATGGCT	GRMZM2G045275	agpv3	chr3	218983131	218983161	218983432	218983462
AMPL21745	GGCCTCAGTCCAAGAGCTT	TGACAGGTATCTGTACTGAAATTTCCTAGT	GRMZM2G045275	agpv3	chr3	218983384	218983403	218983704	218983734
AMPL21746	GGGAGAGCAGGGATACTGAC	GGCCCAGTGCATGACAATTG	GRMZM2G045275	agpv3	chr3	218984069	218984089	218984339	218984359
AMPL21747	CTGAAGATCATAACAAATGAACCTGCA	GGAGCATGTGATCTTTATGTCCACA	GRMZM2G045275	agpv3	chr3	218984302	218984329	218984568	218984593
AMPL21748	TCCAAAAGCTTGGTCGCAGAT	CTACTTGGCAAAATGGCAAATTCTTTTT	GRMZM2G045275	agpv3	chr3	218984528	218984549	218984806	218984834
AMPL21750	AAAAAGAATTTGCCATTTTGCCAAGT	GGTGATGGGTCCGCTGTTC	GRMZM2G045275	agpv3	chr3	218984807	218984833	218985085	218985104
AMPL21751	GCACGGTGAACTGCTCGTA	CGGTTTGATTTCCCTTTCAGTTGG	GRMZM2G045275	agpv3	chr3	218984995	218985014	218985325	218985349
AMPL21752	AGGCGCACAGCTGCTAC	TGTTAGAACTTAGAAGCAACCTCACC	GRMZM2G045275	agpv3	chr3	218985294	218985311	218985549	218985575
AMPL21753	GTTGAGTATGTGCAAGCAGGTTT	CGCCTTTGGGTCGTGCT	GRMZM2G045275	agpv3	chr3	218985505	218985528	218985809	218985826
AMPL21754	TTGGCACGAAGCACGATGC	GGCTATCATTCGTTTTGCTAAACAACA	GRMZM2G045275	agpv3	chr3	218986225	218986244	218986541	218986568
AMPL21755	AAGACAACGTGAGAATGCACTACA	CTTCCTAAAGGATAATGCTAAGCTCACA	GRMZM2G045275	agpv3	chr3	218986366	218986390	218986631	218986659
AMPL21756	TGCCTTGGTAAACTGCTGAGT	GACCGTTTCTGTCACATGTCAC	GRMZM2G045275	agpv3	chr3	218986600	218986621	218986846	218986868
AMPL21783	CCTTTTTGTGCATGTTATAATGTTCTTGC	CTGTCGGCATTCGATTTCGA	kn1 binding site2	agpv3	chr3	3990477	3990506	3990794	3990814
AMPL21784	GTATTCGTATCACGTCAGTGAATCAATC	GCATGCATGCATCTGTTCGATC	kn1 binding site2	agpv3	chr3	3990731	3990759	3991028	3991050
AMPL21785	CAAACGCAAGCTGTGCGAT	AGTGGGCTGGCTTCCATTG	kn1 binding site3	agpv3	chr3	4139234	4139253	4139492	4139511
AMPL21786	CCCACCGCGTTATCCTATCC	CCGCGTACTTTTGGGCGA	kn1 binding site3	agpv3	chr3	4139462	4139482	4139783	4139801
AMPL21787	GAGGAGGGCATGAAGCAATG	CCCTCTTCACCCAATAAAAACTGAG	kn1 binding site3	agpv3	chr3	4139760	4139780	4140060	4140085
AMPL21788	CCGCTGCTTTCCCTTTCGA	GCCCATCCATCGACATGGA	kn1 binding site1	agpv3	chr3	3986645	3986664	3986953	3986972
AMPL21789	CATCTAGCAGGCGTAGCGTA	CGGTCAGCTGTCACTGGT	kn1 binding site1	agpv3	chr3	3986923	3986943	3987279	3987297
AMPL21790	ACGGAGACGGCGTACATC	TAGGGACGTCGTCCGTCGT	kn1 binding site1	agpv3	chr3	3987147	3987165	3987495	3987514
AMPL21791	ACCGTACTACATGCATTGATGCA	GCTTGTCGACGTCGTTGTTG	kn1 binding site1	agpv3	chr3	3987464	3987487	3987719	3987739
AMPL21792	GAGCTCGCAGGCTAGAATACAA	CAGGACCATACAATGATACAAGGCA	kn1 binding site1	agpv3	chr3	3987698	3987720	3988045	3988070
AMPL21793	TCATGCGTTGGCACATGAAAAA	TGGCTATGTGACATGCATGGG	kn1 binding site1	agpv3	chr3	3988001	3988023	3988164	3988185
AMPL5228	GGGTCCCAAAATTCGATCCATTTT	CTTCCTGGAACAATGACATTTTGGG	GRMZM2G067921	agpv3	chr7	175583878	175583902	175584183	175584208
AMPL5229	GCTTCCTGGATTGTTCTTTCATCTTTCT	GCTGCCTAGTGCTTGGTTACTAG	GRMZM2G067921	agpv3	chr7	175584145	175584173	175584448	175584471
AMPL5230	GCTTCCTGGATCTATGTAGTTCTGAG	GTACGACGAGGTAAGCGGGACAT	GRMZM2G067921	agpv3	chr7	175584412	175584438	175584704	175584727
AMPL5231	AGCAAAGCGACCATATATATGAAGGG	GGTCCTTCTTTCCGTACAACCT	GRMZM2G067921	agpv3	chr7	175584666	175584692	175584970	175584992
AMPL5232	CGCCGACAGACATGTCGTC	TGGGCATCATAGACATGGAGGA	GRMZM2G067921	agpv3	chr7	175584897	175584916	175585249	175585271
AMPL5233	GCGGTGTTTGCCCATATGTC	GTCTCTGGTGTCATTTGACCAGT	GRMZM2G067921	agpv3	chr7	175585223	175585243	175585504	175585527
AMPL5234	AGAGATCACTGTTGACTATAGACTCAGAC	GCCTATTGGACAAATATTAAGGTTGGATGA	GRMZM2G067921	agpv3	chr7	175585465	175585494	175585805	175585835
AMPL5235	AACTAACCGTGACCATAATTATGTCCTAAC	ATTTTTCGGAGGCTATAATCACCCTAATC	GRMZM2G067921	agpv3	chr7	175585765	175585795	175585955	175585984
AMPL5236	GGGAAAGCAAGCGCGTAAGTA	AGGGTATTTCTGAGGAGAAAAATATTTTGAGAA	GRMZM2G067921	agpv3	chr7	175585924	175585945	175586194	175586227
AMPL5237	AATATTTTTCCAGTGACTCCATCAAATTCTTTC	CATTTCCCTTTCAAGTGAGTTGTCATG	GRMZM2G067921	agpv3	chr7	175586131	175586164	175586453	175586480
AMPL3290	GGGATCTAGCTCAACGCCG	GAGCTGCTGCTGGTGCT	GRMZM2G700665	agpv3	chr8	131577542	131577561	131577663	131577680
AMPL3832	TGTAAATTGAAATGGAGGGACTAGCATT	CAAATAGACCCGAATTAGACATATCTAGACATT	vgt1	agpv3	chr8	131519022	131519050	131519172	131519205
AMPL3926	CTGGACTGGACGCCCAGAAT	GGTGACGCCTCTGTACCT	GRMZM2G700665	agpv3	chr8	131578225	131578245	131578473	131578491
AMPL3990	TATGGAGTCCAGCAGGAGGCAAA	CCCATGTGACCAAGGAACATCT	GRMZM2G179264	agpv3	chr8	123033426	123033449	123033660	123033682
AMPL5137	GGGAAGATAATTCCTTTTCTGGATTTGG	CAGTGCGTGTGTCATTATTCTGTC	vgt1	agpv3	chr8	131517125	131517153	131517393	131517417
AMPL5138	CGTTTGACTGGTAGTACATCTGATACTACT	GTGGTCGCACTGTACGTTTTTC	vgt1	agpv3	chr8	131517351	131517381	131517616	131517638
AMPL5139	GGCCACCATACCAGTATACCAC	CCTGCTCCTTTTGACGACCTTT	vgt1	agpv3	chr8	131517569	131517591	131517869	131517891
AMPL5140	CCGTCTCAAGGGACAAGTTGTA	CCTTCCACTTCAGGCATCTTCTAC	vgt1	agpv3	chr8	131517720	131517742	131517963	131517987
AMPL5141	GTTACGTTTGCCTACCTTCACAC	GTCACTACAACGCATGATACATGG	vgt1	agpv3	chr8	131517930	131517953	131518088	131518112
AMPL5142	GCTCTCACAGTCTCACTTCACA	GTCAAGTGGTTTGGGCATCAA	vgt1	agpv3	chr8	131518057	131518079	131518368	131518389
AMPL5143	ATGGTTTTGATGCCCAAACCAC	GCTCTTAAATTTGTCCTTACTTGGTGTAAAAAG	vgt1	agpv3	chr8	131518363	131518385	131518556	131518589
AMPL5144	CACGAGGTTAAATACAGCTTCCTCAAT	GCACCTCTCCTCGACATGAATAC	vgt1	agpv3	chr8	131518497	131518524	131518779	131518802
AMPL5145	GGATTTGACGTTAATTGCTTCTTTGTGG	AGCTAGTCTATTTAGATCATCAGTTCCAGT	vgt1	agpv3	chr8	131518729	131518757	131519060	131519090
AMPL5179	AGAAACATACCTTTTGCCTTGATTTTCAC	GCTAACAACCAATGGTTAAATGTGTTTTTGA	GRMZM2G700665	agpv3	chr8	131574865	131574894	131575189	131575220
AMPL5180	TCACTTCTCACTTTATTTGGCACATAAGA	CGAAGGTATTCAATACCAAAGCTCCTG	GRMZM2G700665	agpv3	chr8	131574890	131574919	131575236	131575263
AMPL5182	TTTTTACTATCTTTTGCACAGGGCC	CCGATTTGGTGGGTGGG	GRMZM2G700665	agpv3	chr8	131576466	131576491	131576746	131576763
AMPL5183	TGGAGTGGAGAAATGACAAATCCAG	CAGCAATCTCAGTTATCCTTTAATTTCTTTCG	GRMZM2G700665	agpv3	chr8	131576709	131576734	131577050	131577082
AMPL5184	CCCTAGCTTTGCTAGCTCTAGC	CCAAGCTTACAACTCGCAAGC	GRMZM2G700665	agpv3	chr8	131577023	131577045	131577368	131577389
AMPL5185	TCGGCACTCTCCTGCTTCTA	GCTATCGCTCCGGATGAGGAT	GRMZM2G700665	agpv3	chr8	131577252	131577272	131577578	131577599
AMPL5187	GGAGTCCCACATCTGGTCAG	GTTAATCAATCAATTCGGTCAGAGACTCA	GRMZM2G700665	agpv3	chr8	131577911	131577931	131578255	131578284
AMPL5188	CTACGAGGACGACATGAAGCAGAT	TTCTGATTGAAACAACCAGCTACATACA	GRMZM2G700665	agpv3	chr8	131578377	131578401	131578719	131578747
AMPL5189	TCAGTAAAAGTATACATAGGTTAGCTGCAT	CGTAGGCTCTGGATTTCGAAGAA	GRMZM2G700665	agpv3	chr8	131578685	131578715	131578971	131578994
AMPL5190	GACTCGATTCCTCTTCGTGTCT	GTCAAGGTATATCTATCGTTAGCGCTT	GRMZM2G700665	agpv3	chr8	131578939	131578961	131579284	131579311
AMPL5191	GAGGGCTCCGAACTGAAGAAAA	CCTTGGAACAGACAGGTTTGAACT	GRMZM2G700665	agpv3	chr8	131579256	131579278	131579596	131579620
AMPL5192	CCATGAGGTTAGGTGACAGCTACT	TCCTGATGCACTCATCTGCATT	GRMZM2G700665	agpv3	chr8	131579556	131579580	131579897	131579919
AMPL5193	TCCTAATCGTACTATGTCAGTGAATGAACT	GCGCAAAACTGAAAAAGTCGCA	GRMZM2G700665	agpv3	chr8	131579857	131579887	131580208	131580230
AMPL5194	CAAGAAGCCGCACTGTAAATCTG	ACAGTTTTATGGCGGTCAGGAAA	GRMZM2G700665	agpv3	chr8	131580139	131580162	131580489	131580512
AMPL5205	CACTATGTGATGCTGTGATTGTTTTCC	AGGTTTAGGGAAGAGTAGAAACCATAGG	GRMZM2G179264	agpv3	chr8	123030226	123030253	123030551	123030579
AMPL5206	GAGACTAAGCTCTCAACCTTTCAAGT	TGGTATTTGTGCTGTTCCGTCAA	GRMZM2G179264	agpv3	chr8	123030417	123030443	123030714	123030737
AMPL5207	GCATTTCTGGTGCAAAAACTGTC	TACTCGATTTTACCTGAGACTTTGAAACC	GRMZM2G179264	agpv3	chr8	123030681	123030704	123030957	123030986
AMPL5209	GTTTCAAAGTCTCAGGTAAAATCGAGTATG	TTCTTTAATTGGTTGGTAACCTTGAGGT	GRMZM2G179264	agpv3	chr8	123030959	123030989	123031071	123031099
AMPL5210	GGCAACTGTAAATGAACCTTAGTTCTG	ACTGATGCAGATAAGGATGCAATTAATACA	GRMZM2G179264	agpv3	chr8	123031034	123031061	123031348	123031378
AMPL5211	CCATATTGCATTCACCTAACAAGTTGG	CAATATGTTCCACTTCCTAGATTTGGTTCT	GRMZM2G179264	agpv3	chr8	123031291	123031318	123031574	123031604
AMPL5213	AGAACCAAATCTAGGAAGTGGAACATATTG	AGGGCTTTCTACACCCTGGTAA	GRMZM2G179264	agpv3	chr8	123031575	123031605	123031877	123031899
AMPL5214	ACTGCAAGATTTAGGCATTTTGTTCTTAT	TCTGCAATATATGTCAGCAACCGAT	GRMZM2G179264	agpv3	chr8	123031726	123031755	123032061	123032086
AMPL5215	TGTATGACACGAGCCATAACCAAAT	CATGATTTGGCAAAGAAGCACAATTC	GRMZM2G179264	agpv3	chr8	123032036	123032061	123032266	123032292
AMPL5216	TACCATTGTCATGTCATACGTCACC	CTTCTGTACAGCATGTGGGTTCT	GRMZM2G179264	agpv3	chr8	123032233	123032258	123032582	123032605
AMPL5217	GTGTGAACAATGAGGTGCATTTTAGT	ACTTATTCATGGTGTTAATGCACCCAA	GRMZM2G179264	agpv3	chr8	123032415	123032441	123032700	123032727
AMPL5219	AGCTAGTTCGATACTAGTTACTGCCT	CCTTAGACATTTGGCGAAACTTTGC	GRMZM2G179264	agpv3	chr8	123032848	123032874	123033194	123033219
AMPL5220	CACCTTACGAGCAAACTCCCTT	AGGTGAACCTAATGCATCATGAGAAATAAA	GRMZM2G179264	agpv3	chr8	123033143	123033165	123033466	123033496
AMPL5221	TGTCCCTCTCGCTAGCAAAGTA	GCGAATATCGTCCACTCAGTAAAGATATA	GRMZM2G179264	agpv3	chr8	123033633	123033655	123033970	123033999
AMPL5222	CGCGATCCAATACGAGAACACT	TCACTGGATGCAACAGATAGATGC	GRMZM2G179264	agpv3	chr8	123033933	123033955	123034283	123034307
AMPL21251	CATCGTCCTTTTCATGGTTGCC	GTGAAAGCTCCATGTGTGGTTC	GRMZM2G038783	agpv3	chr9	108446738	108446760	108446847	108446869
AMPL21415	CATGTCTAGTGCCTTTCCAATGACTATAAA	ACTGAATATGGTGCACCAGATGTTTA	GRMZM2G038783	agpv3	chr9	108446147	108446177	108446355	108446381
AMPL21433	TGTCATATGTGCTCGACTTCGG	CATTAGCAGCGGCTACTGC	GRMZM2G038783	agpv3	chr9	108449395	108449417	108449630	108449649
AMPL21769	GTGATGCACTAGGAGCTCTCC	GCCTAGCACACACTAGACATATTTATTGAAAG	GRMZM2G038783	agpv3	chr9	108445917	108445938	108446206	108446238
AMPL21771	TGTTTGGTGCATCACTAAACATGTC	GATAGGTTAAGTTCACACCCAGGTTT	GRMZM2G038783	agpv3	chr9	108446456	108446481	108446770	108446796
AMPL21772	GAAACTTTACACCTGATAGGAGCACT	GGGACAGAGGAAGAGGATAATCA	GRMZM2G038783	agpv3	chr9	108447389	108447415	108447693	108447716
AMPL21773	GCATCACCGTCAGGGATTATCC	AGAGTGGCTGGCGTAGTAGT	GRMZM2G038783	agpv3	chr9	108447654	108447676	108447991	108448011
AMPL21774	ACCACCATGCTATGCGCT	ACCTCGCACATCCACACG	GRMZM2G038783	agpv3	chr9	108447959	108447977	108448290	108448308
AMPL21775	CACGTGCGTTGGTGGATC	CCTCCACGTTGAGGTTCAGC	GRMZM2G038783	agpv3	chr9	108448216	108448234	108448557	108448577
AMPL21776	CGTGGAGGCCATGCTGTT	CGAAGCTTACGCTATGAGCGAG	GRMZM2G038783	agpv3	chr9	108448462	108448480	108448759	108448781
AMPL21777	CACTCCTCCTACAGCTCCTACA	CGAGCACATGGAGTGTCTAACG	GRMZM2G038783	agpv3	chr9	108448727	108448749	108449057	108449079
AMPL21778	CCCAACCAAGCTCCCAACTTT	TTTTCTCACGGTACCGCATCA	GRMZM2G038783	agpv3	chr9	108449024	108449045	108449214	108449235
AMPL21779	GCTCGTCCTGACGTATCGTT	GGGCACATCAAAAGCTCGGTA	GRMZM2G038783	agpv3	chr9	108449075	108449095	108449427	108449448
AMPL2664	CGGTTTCGTTCTTCATTTCATCAGC	GCGGTGGCCAAGTCCAT	GRMZM2G085218	agpv3	chr9	106530277	106530302	106530422	106530439
AMPL2678	GGCGGATCAGATTCGGC	AAAACTCGTGGCTCGGCT	GRMZM2G085218	agpv3	chr9	106532492	106532509	106532641	106532659
AMPL3188	CTCGGCAATCTTTGCATTCCAC	ATTGTCAATGGACAACGTCAACTTG	GRMZM2G092174	agpv3	chr9	135249682	135249704	135249821	135249846
AMPL3201	CTGGATGCGTGAGAGGTAGG	AAGGCCGTCGCTCAGTAC	GRMZM2G092174	agpv3	chr9	135251425	135251445	135251562	135251580
AMPL3857	GAGCATAAGGGTAAAGCTTAGAATGC	GGCATTTGAGATTCAGAGACAACAAGA	GRMZM2G092174	agpv3	chr9	135248053	135248079	135248289	135248316
AMPL3874	CCCACAACTTCATTGATGAGGAGATG	CGGTTCCTGTTCCAGCAGAA	GRMZM2G092174	agpv3	chr9	135250545	135250571	135250783	135250803
AMPL3884	GGTCCACATGAGTTAATAACACGTG	TACAAAGGCGAAAGTATCCGCAT	GRMZM2G092174	agpv3	chr9	135251968	135251993	135252214	135252237
AMPL3885	GGTCTGGAATGGATTGCGCT	CTTATAGCAAATGTAAATGGATTTATACACGGG	GRMZM2G092174	agpv3	chr9	135252175	135252195	135252345	135252378
AMPL4119	GCTCCATGTCCAAGGCACT	AAAAAGCACAGAAATCTGCTCTAATTTC	GRMZM2G405368	agpv3	chr9	35635951	35635970	35636129	35636157
AMPL4966	GTATAATTGATATCATGATGTCACACCTCGA	CCGCCACGTCCTTGATCTTT	GRMZM2G085218	agpv3	chr9	106529992	106530023	106530311	106530331
AMPL4967	CGCCATGGACTTGGCCA	GAGCTCCTGCGTGTCCA	GRMZM2G085218	agpv3	chr9	106530419	106530436	106530774	106530791
AMPL4968	GGACTCGTACCCGCACT	GCTTAGCTCTCGGTCTCGC	GRMZM2G085218	agpv3	chr9	106530797	106530814	106531124	106531143
AMPL4969	GATCTTTGGAGGTGATCGATGGA	TGCAACGTGCAAGAATAGTATTTGTTTC	GRMZM2G085218	agpv3	chr9	106531076	106531099	106531414	106531442
AMPL4970	GACCCTCGTCCACAGAAACC	GATCTAGATGTGGCCTGGGTTT	GRMZM2G085218	agpv3	chr9	106531384	106531404	106531736	106531758
AMPL4971	TGACGTGCCGGTGGTAAC	CCCAGGATCAGAGAACCCATCTAG	GRMZM2G085218	agpv3	chr9	106531709	106531727	106531981	106532005
AMPL4972	TTTGGTTCACGAAATGTAACATAAAGGC	CGAACCAAGTAAACAGTTATAATTTATGCCA	GRMZM2G085218	agpv3	chr9	106531796	106531824	106532104	106532135
AMPL4973	GGCCACCACAAGTGACTGA	GGGCATGAGAGATTGAATAAACCG	GRMZM2G085218	agpv3	chr9	106532608	106532627	106532958	106532982
AMPL4974	GTTCTTCTATCACCAAATTAATTGCGTTCT	CAGCCACAAGATGGATGCTTTG	GRMZM2G085218	agpv3	chr9	106532864	106532894	106533216	106533238
AMPL4987	AGCTACTGTACTGGTACAGGTACTA	CCTCCTGATCAGCGAGATCA	GRMZM2G359322	agpv3	chr9	123214991	123215016	123215284	123215304
AMPL4988	CACCTTGGACTCGTGGTTGT	GTGAACCCACATCCTCCTCAC	GRMZM2G359322	agpv3	chr9	123215262	123215282	123215534	123215555
AMPL4989	CAATTCTGCACTCTTTGTCAGCA	CGGTCGTTAATTCCGAGATCGAT	GRMZM2G359322	agpv3	chr9	123215474	123215497	123215755	123215778
AMPL4990	AGATGTACTTGCCGAATCTTTCCAG	GTGCTACGGAGGAGTACTACGA	GRMZM2G359322	agpv3	chr9	123215706	123215731	123215949	123215971
AMPL4991	TGGTGGTGCTTCTTACCTCCT	ACGCAGAGGGCGATGATAG	GRMZM2G359322	agpv3	chr9	123215915	123215936	123216252	123216271
AMPL4993	ACTCTACTAATTTTCTAACATTTCTTTACACGA	CCAAAGTTAGGCAATAGCTTTTGC	GRMZM2G359322	agpv3	chr9	123216648	123216681	123216803	123216827
AMPL4994	CGAGTTTGGCGTGATGCATAC	AGTCAATGGGTGTCGTCTTTATCC	GRMZM2G359322	agpv3	chr9	123216694	123216715	123217044	123217068
AMPL4995	GAAACGCTAGATACATGTGTACCTGA	CATGTACAATACTCAGAACTGGTTCTCTG	GRMZM2G359322	agpv3	chr9	123217141	123217167	123217454	123217483
AMPL4996	CCGAAACCTCTCTCGCCAC	GGCTGGCTCTAGTTGGC	GRMZM2G359322	agpv3	chr9	123217423	123217442	123217632	123217649
AMPL5148	GCTTCTTGTAAATTAGGCACCCTCTT	ATTCCCAATGGTCAACCCAAGAA	GRMZM2G092174	agpv3	chr9	135245418	135245444	135245765	135245788
AMPL5149	TGAGGATTTTCCTGCATGTGCTT	TTTCTTGTGTTGACTCAATTTCTTTAACTTAGC	GRMZM2G092174	agpv3	chr9	135245732	135245755	135246070	135246103
AMPL5150	CTCTCATACTATTTATGTTACCATCAAATCCCA	CGAGAATGGCTGGGTAGAAATACAAG	GRMZM2G092174	agpv3	chr9	135246028	135246061	135246373	135246399
AMPL5151	TCTGTATCTGTTCCGTCATAATTCTGTTTTAC	GGATTTACAACTTATTCGAGATATCCCTGAT	GRMZM2G092174	agpv3	chr9	135246331	135246363	135246491	135246522
AMPL5152	TCTAAATTGATCACCATATGCTGATGCA	GTTCAGTGTTTACACTGTAGATAATAGCATTTT	GRMZM2G092174	agpv3	chr9	135246453	135246481	135246706	135246739
AMPL5153	ATACAGCAACATTCAAACTTATGTCTTAGGTTA	GAGATGCTGTATTTCATTTGCTTGCA	GRMZM2G092174	agpv3	chr9	135246663	135246696	135247003	135247029
AMPL5154	TGATCAAGTGTATAAAAATCAACCAGAAAAGAT	TGCATAGTGGGTGTTTTCTGCTTA	GRMZM2G092174	agpv3	chr9	135246960	135246993	135247233	135247257
AMPL5155	TGAAGCACAAAGGTTCACAATCCT	GGCTGATTGTGTACATCATTATGGTTGTAA	GRMZM2G092174	agpv3	chr9	135247184	135247208	135247479	135247509
AMPL5156	CTTGGTCCTGGTTTAGTAGCCA	ACTACCCTTTAAGACACTTTTGTTATTACCC	GRMZM2G092174	agpv3	chr9	135247438	135247460	135247767	135247798
AMPL5157	CAGTTTCAAATATCGTCCGAGCAAG	TAACTTGAGCCTGGAGTAGCCTTA	GRMZM2G092174	agpv3	chr9	135247726	135247751	135247974	135247998
AMPL5158	CTACCAGTCAAGATTAGCACCAACT	GTTAAGGATGCCAGTCTCAAAAGTATTG	GRMZM2G092174	agpv3	chr9	135247939	135247964	135248089	135248117
AMPL5159	AGTCATCTGCAATAGAGAGTTGGTAAAC	GTTCATGGTTGTCATTCACAATGCTATAG	GRMZM2G092174	agpv3	chr9	135248187	135248215	135248470	135248499
AMPL5160	CGAAAAATGAAAAAGGGAACTTCTCAGA	GACAAAAGGTGGTCATGGATAAATTTATCA	GRMZM2G092174	agpv3	chr9	135248432	135248460	135248710	135248740
AMPL5161	GGGTAGCAGAGGATTAGGATTGTGTA	TGGGTCAGAGCAATCTAAGGGT	GRMZM2G092174	agpv3	chr9	135248658	135248684	135248828	135248850
AMPL5162	GGAACAAGCATTGACAATAACAAATATTGC	AGACAAACTAGCAACTACCGTCAAATT	GRMZM2G092174	agpv3	chr9	135248799	135248829	135249134	135249161
AMPL5163	CCCAGTTGAACATCCATCAAAGC	GAGGCTAATTTGTGCATGCATCT	GRMZM2G092174	agpv3	chr9	135248924	135248947	135249263	135249286
AMPL5164	CTTGACTGACATAGGAGGGCTTT	GCGAGCTTTAAGAGGTATTCCATTTT	GRMZM2G092174	agpv3	chr9	135249231	135249254	135249560	135249586
AMPL5165	ACATGTATACATCGTGTCCATACACTTT	CATATTTGCAGTAGATACTGATGGATGCA	GRMZM2G092174	agpv3	chr9	135249423	135249451	135249710	135249739
AMPL5166	GCTACAGAGCTAAGCTCATTTATCCC	CAAGTGATTACTTGTTTTGGTTTAGGTCAC	GRMZM2G092174	agpv3	chr9	135249779	135249805	135250070	135250100
AMPL5168	CTAAACCAAAACAAGTAATCACTTGGTGT	GAGATTCACCAGCTGGCATCAT	GRMZM2G092174	agpv3	chr9	135250076	135250105	135250345	135250367
AMPL5169	ACTTCCCACGATAATACAGTGCAG	TTAGCAGTGGTGGTGACGAC	GRMZM2G092174	agpv3	chr9	135250278	135250302	135250590	135250610
AMPL5170	GCATGGCAGTCTGCGATCA	CACTGGTTACGACCGTGTCA	GRMZM2G092174	agpv3	chr9	135250754	135250773	135250919	135250939
AMPL5171	CCGTGCTCGTCTTCATGGAA	CTCAACCCGCTATGGATCCA	GRMZM2G092174	agpv3	chr9	135250889	135250909	135251161	135251181
AMPL5172	GGCGTAGAACGGCTTGGAG	GTCCTCCGAGCAGCAGATC	GRMZM2G092174	agpv3	chr9	135251131	135251150	135251448	135251467
AMPL5173	AGCGACTGGGAGTAGTCGAA	ACGGTGAAGCAAAGCTAAGGTATC	GRMZM2G092174	agpv3	chr9	135251486	135251506	135251830	135251854
AMPL5174	GGGAGCTCTCACTGGATTAGG	CCCACTTCTTTATTGGAACAATTGGATCTA	GRMZM2G092174	agpv3	chr9	135251749	135251770	135252034	135252064
AMPL5175	GGCCCTAACTTTCCGTGTATG	GGAGGGAGATCGTTGTTGCC	GRMZM2G092174	agpv3	chr9	135252941	135252962	135253204	135253224
AMPL5176	TCGTCGTCCAGCGGTAGA	TTGAACAATTTTATTTTCTTTGTGTTCCTTGC	GRMZM2G092174	agpv3	chr9	135253177	135253195	135253519	135253551
AMPL5265	GACCGTCCGACTAGGTAGTTC	CGATTATAGGAGATTAGTACGTGCATTTGA	GRMZM2G405368	agpv3	chr9	35633163	35633184	35633441	35633471
AMPL5266	GTGACAACCTCTAGCCGATGTATTAT	GCTTCAAATCGAGGAGCACAAG	GRMZM2G405368	agpv3	chr9	35633360	35633386	35633686	35633708
AMPL5267	GCCTGTCCGCACCTCAA	TAGAGCTCTCTGTAGCTCGTCC	GRMZM2G405368	agpv3	chr9	35634457	35634474	35634785	35634807
AMPL5268	TTGTGGGTCTTTAAAACTGGTAGTCAT	GCAATGCAATCAATGGTTGAGC	GRMZM2G405368	agpv3	chr9	35634621	35634648	35634885	35634907
AMPL5270	GCTCAACCATTGATTGCATTGC	GGATCATCTATGTCTATAATTTGTAGGTCCGAT	GRMZM2G405368	agpv3	chr9	35634886	35634908	35635144	35635177
AMPL5271	ACCAAGCTCAAGCTATTGCGA	GCGTGGGTAGGATGGTCTTT	GRMZM2G405368	agpv3	chr9	35635048	35635069	35635331	35635351
AMPL5272	CCGACCTCATTTGCAGCC	GCGAGTGAAATGGCCGTAG	GRMZM2G405368	agpv3	chr9	35635287	35635305	35635631	35635650
AMPL5273	ACGCAACTTCCCATTCCGAT	GAAATACGATGAAAGCTGCAGGTAATT	GRMZM2G405368	agpv3	chr9	35635368	35635388	35635679	35635706
AMPL5274	CTTCTGAGCATCTACCTGCACTT	TGTGATGTGGATTGTTACCTGATAACAA	GRMZM2G405368	agpv3	chr9	35635653	35635676	35635980	35636008
AMPL5275	ATTGTATTTGATAGCTTCACATATTCCTTCCAT	TCCACTACCTATATATGTGTGGACATGT	GRMZM2G405368	agpv3	chr9	35636445	35636478	35636744	35636772
AMPL5276	GGGACTGGTCCACCAACTTAAA	AAGTCATCTCTAGCATTCTGTCCTTATCT	GRMZM2G405368	agpv3	chr9	35636712	35636734	35636968	35636997
AMPL5277	CGTCCGCTTCACTCTCG	GCATGTGAGGAGAGTTGGAGTATAAG	GRMZM2G405368	agpv3	chr9	35636813	35636830	35637151	35637177
AMPL5279	TATACTCCAACTCTCCTCACATGCA	GCCAGGTCAACAGATAGTTTCCT	GRMZM2G405368	agpv3	chr9	35637154	35637179	35637421	35637444
AMPL5280	TCGCGTTAGATATTTGCGGATGA	CTTTTAAGTCAAAGCAGTGCTAGTATGTTT	GRMZM2G405368	agpv3	chr9	35637388	35637411	35637732	35637762
AMPL5281	CCTTCATTCATGCATGCTTTCTGT	AGTCCAGTGCAGAGTACTAATAGGAG	GRMZM2G405368	agpv3	chr9	35637698	35637722	35638024	35638050
AMPL5282	GTCACGCCCTGGATTCCTC	CATGACGCGCACAGGTAC	GRMZM2G405368	agpv3	chr9	35637995	35638014	35638262	35638280
AMPL5283	CAGCGTGGTGTACTGCCA	GTGAGCAGCAGCCAGGAGTC	GRMZM2G405368	agpv3	chr9	35638233	35638251	35638563	35638583
AMPL5284	CCGTTGCTGGTGACAAGGA	TGATGTGGTTGTCACAGTAGGAAC	GRMZM2G405368	agpv3	chr9	35638535	35638554	35638702	35638726
AMPL5285	GACGTTGACGAGTACTTCGATCT	AGACGCGTACGTAGTGTAATTAGTAGTAAT	GRMZM2G405368	agpv3	chr9	35638669	35638692	35638938	35638968
AMPL5286	CTTACACAGATTCCATCAGCAACAG	CATTGACGATGAGAAAGAGATCTGAGAT	GRMZM2G405368	agpv3	chr9	35638901	35638926	35639217	35639245
AMPL5287	TACGATTCGCATATTTCAGTGACCAT	CAGCTGAGAACATCTGATCCACTT	GRMZM2G405368	agpv3	chr9	35639181	35639207	35639531	35639555
AMPL5288	GCTTCGCGAAAAGATCGTCTGA	TTGCTAATCCATGGCAACAAAGAATC	GRMZM2G405368	agpv3	chr9	35639499	35639521	35639846	35639872
