# Supplementary material for: High-Throughput Resequencing of Maize Landraces at Genomic Regions Associated with Flowering Time
Source: PLoS One. 2017 Jan 3;12(1):e0168910. doi: 10.1371/journal.pone.0168910 (PMC5207663; doi:10.1371/journal.pone.0168910)
Supplement: S1 Table — Race and collection information for resequenced landraces accessions. (CSV) [file pone.0168910.s002.csv]

Sample ID	Country of origin	Accession	Race	Altitude	Latitude	Longitude
12GHLR020	ARGENTINA	ARG 482	PISINCHO	2287	-23	65
12GHLR021	BOLIVIA	BOV 730	ALTIPLANO	1400	-16	68
12GHLR022	BOLIVIA	BOV 461	ARGENTINO	1120	-21	64
12GHLR023	BOLIVIA	BOV 968	AYSUMA	1948	-21	64
12GHLR024	BOLIVIA	BOV1133	CAMBA	1570	-16	68
12GHLR025	BOLIVIA	BOV1083	CATETO	240	-11	67
12GHLR026	BOLIVIA	BOV 389	CHAKE-SARA	2201	-17	65
12GHLR027	BOLIVIA	BOV 320	CHECCHI	2080	-17	66
12GHLR028	BOLIVIA	BOV 705	CHOLITO	500	-22	63
12GHLR029	BOLIVIA	BOV 360	CHUSPILLU	1921	-21	64
12GHLR030	BOLIVIA	BOV1002	CONFITE_PUNENO	3128	-19	65
12GHLR031	BOLIVIA	BOV1037	COROICO	170	-11	68
12GHLR032	BOLIVIA	BOV 438	COROICO_AMARILLO	130	-14	64
12GHLR033	BOLIVIA	BOV1062	COROICO_BLANCO	100	-14	65
12GHLR034	BOLIVIA	BOV 585	CUBANO_DENTADO	330	-16	60
12GHLR035	BOLIVIA	BOV 725	CUZCO	3780	-16	68
12GHLR036	BOLIVIA	BOV1032	ENANO	180	-11	68
12GHLR037	BOLIVIA	BOV 762	HUILCAPARU	2497	-17	65
12GHLR038	BOLIVIA	BOV 623	HUILCAPARU MOTEADO	2001
