# Supplementary material for: High-Throughput Resequencing of Maize Landraces at Genomic Regions Associated with Flowering Time
Source: PLoS One. 2017 Jan 3;12(1):e0168910. doi: 10.1371/journal.pone.0168910 (PMC5207663; doi:10.1371/journal.pone.0168910)
Supplement: S2 Table — Information pertaining to the software, versions, and parameters used for data analysis. (XLSX) [file pone.0168910.s003.xlsx]

## Sheet: Sheet1
software	version	command
bwa	0.7.13-r1126	bwa mem -t 4 -R '@RG\tID:'$now'\tLB:P07\tSM:'$f'\tPL:IONTORRENT' $REFERENCE $f
bowtie2	2.2.6	bowtie2 -p 4 -x /media/sf_LRS/data/extdata/Zea_mays.AGPv3.27.dna.genome --sensitive-local $f
samtools	1.3	samtools mpileup -uf $REFERENCE --bam-list $REALIGNEDBAMLIST | bcftools call -vmO z -o allsamples.raw.mpileup.vcf.gz
GATK	3.5	-T HaplotypeCaller \
		-R $REFERENCE \
		-I $BAM \
		-L $INTERVALS \
		-stand_call_conf 2.0 \
		-stand_emit_conf 1.0 \
		-out_mode $outmode \
		--emitRefConfidence GVCF \
		--variant_index_type LINEAR \
		--variant_index_parameter 128000 \
		-o $BAM.output.raw.snps.indels.g.vcf
